# Supplementary material for: Human Plasmacytoid and Monocyte-Derived Dendritic Cells Display Distinct Metabolic Profile Upon RIG-I Activation
Source: PubMed Central journal article supplement (PMC6308321; doi:10.3389/fimmu.2018.03070), 2018-12-21
Supplement: Data_Sheet_1.pdf [file Data_Sheet_1.pdf]

*Supplementary Material*

**Human plasmacytoid and monocyte-derived dendritic cells display distinct metabolic profile upon RIG-I activation**

**Tünde Fekete, Mate Sütő, Dora Bencze, Anett Mázló, Attila Szabo, Tamas Biro, Attila Bacsi, Kitti Pazmandi\***

\* **Correspondence:** Kitti Pazmandi: pazmandikitti@yahoo.de

**Supplementary Figures**

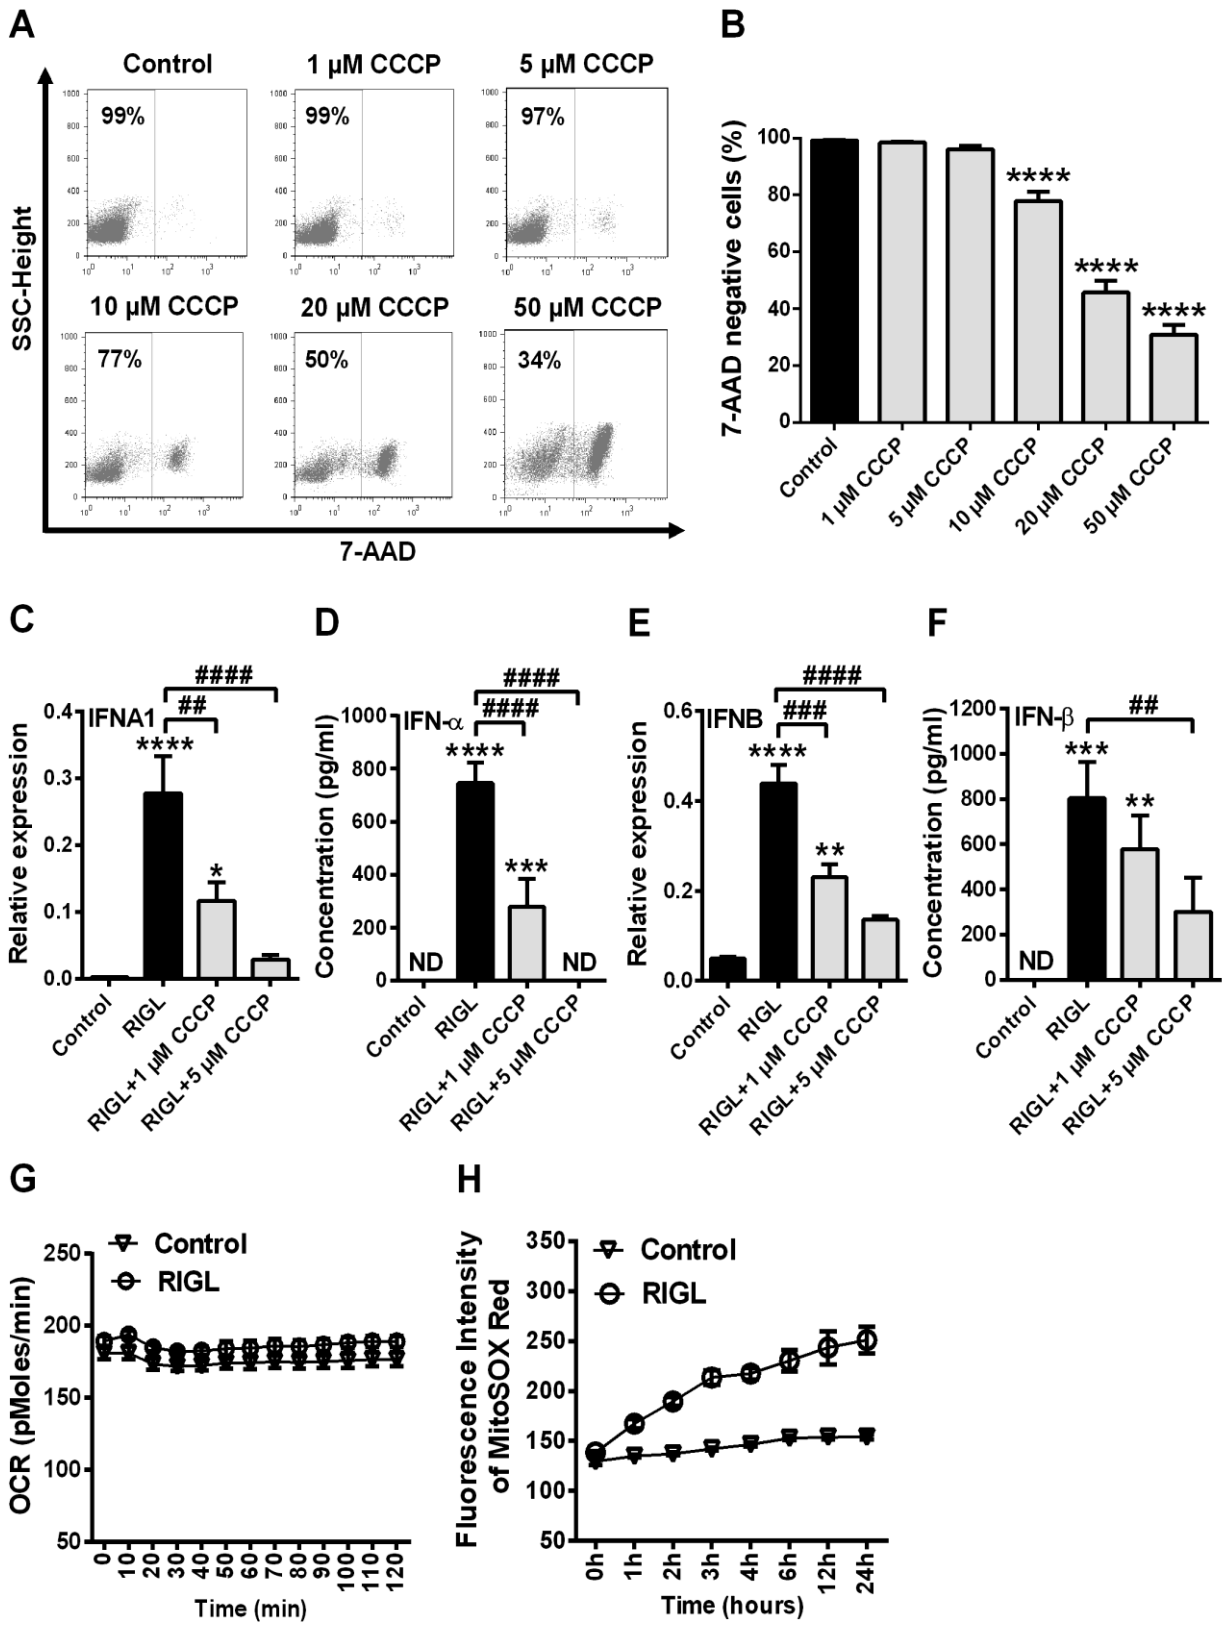

**Supplementary Figure 1.** Inhibition of oxidative phosphorylation (OXPHOS) affects the RIG-I-mediated type I IFN production in GEN2.2 cells. **(A,B)** GEN2.2 cells were treated with increasing concentration of mitochondrial uncoupler carbonyl cyanide m-chlorophenylhydrazone (CCCP; 1-50  $\mu$ M), then cell viability was analyzed by flow cytometry. **(C-F)** GEN2.2 cells were pre-treated with 0.25  $\mu$ M of CpG-A for 16 hours then following thorough washing steps stimulated with the RIG-I agonist 5'ppp-dsRNA (RIGL, 1  $\mu$ g/ml) in the presence or absence of CCCP (1 and 5  $\mu$ M). The expression of IFN- $\alpha$  and IFN- $\beta$  was measured at the mRNA level by Q-PCR at 3 hours **(C,E)** and at the protein level by ELISA at 6 hours **(D,F)**. **(G)** Following activation with 5'ppp-dsRNA real-time OCR was determined by EFA. The results of a representative experiment are shown. **(H)** The mtROS production was detected by MitoSOX<sup>TM</sup> Red mitochondrial superoxide indicator. The results of a representative experiment are shown. **(A)** Representative dot plots are shown and numbers indicate the percentage of 7-aminoactinomycin D (7-AAD) negative cells. **(B-F)** Data represent the mean  $\pm$  SD of at least 3 individual experiments. \* $p$ <0.05, \*\* $p$ <0.01, \*\*\* $p$ <0.001, \*\*\*\* $p$ <0.0001 vs. control; ## $p$ <0.01, ### $p$ <0.001, #### $p$ <0.0001, ND: not determined

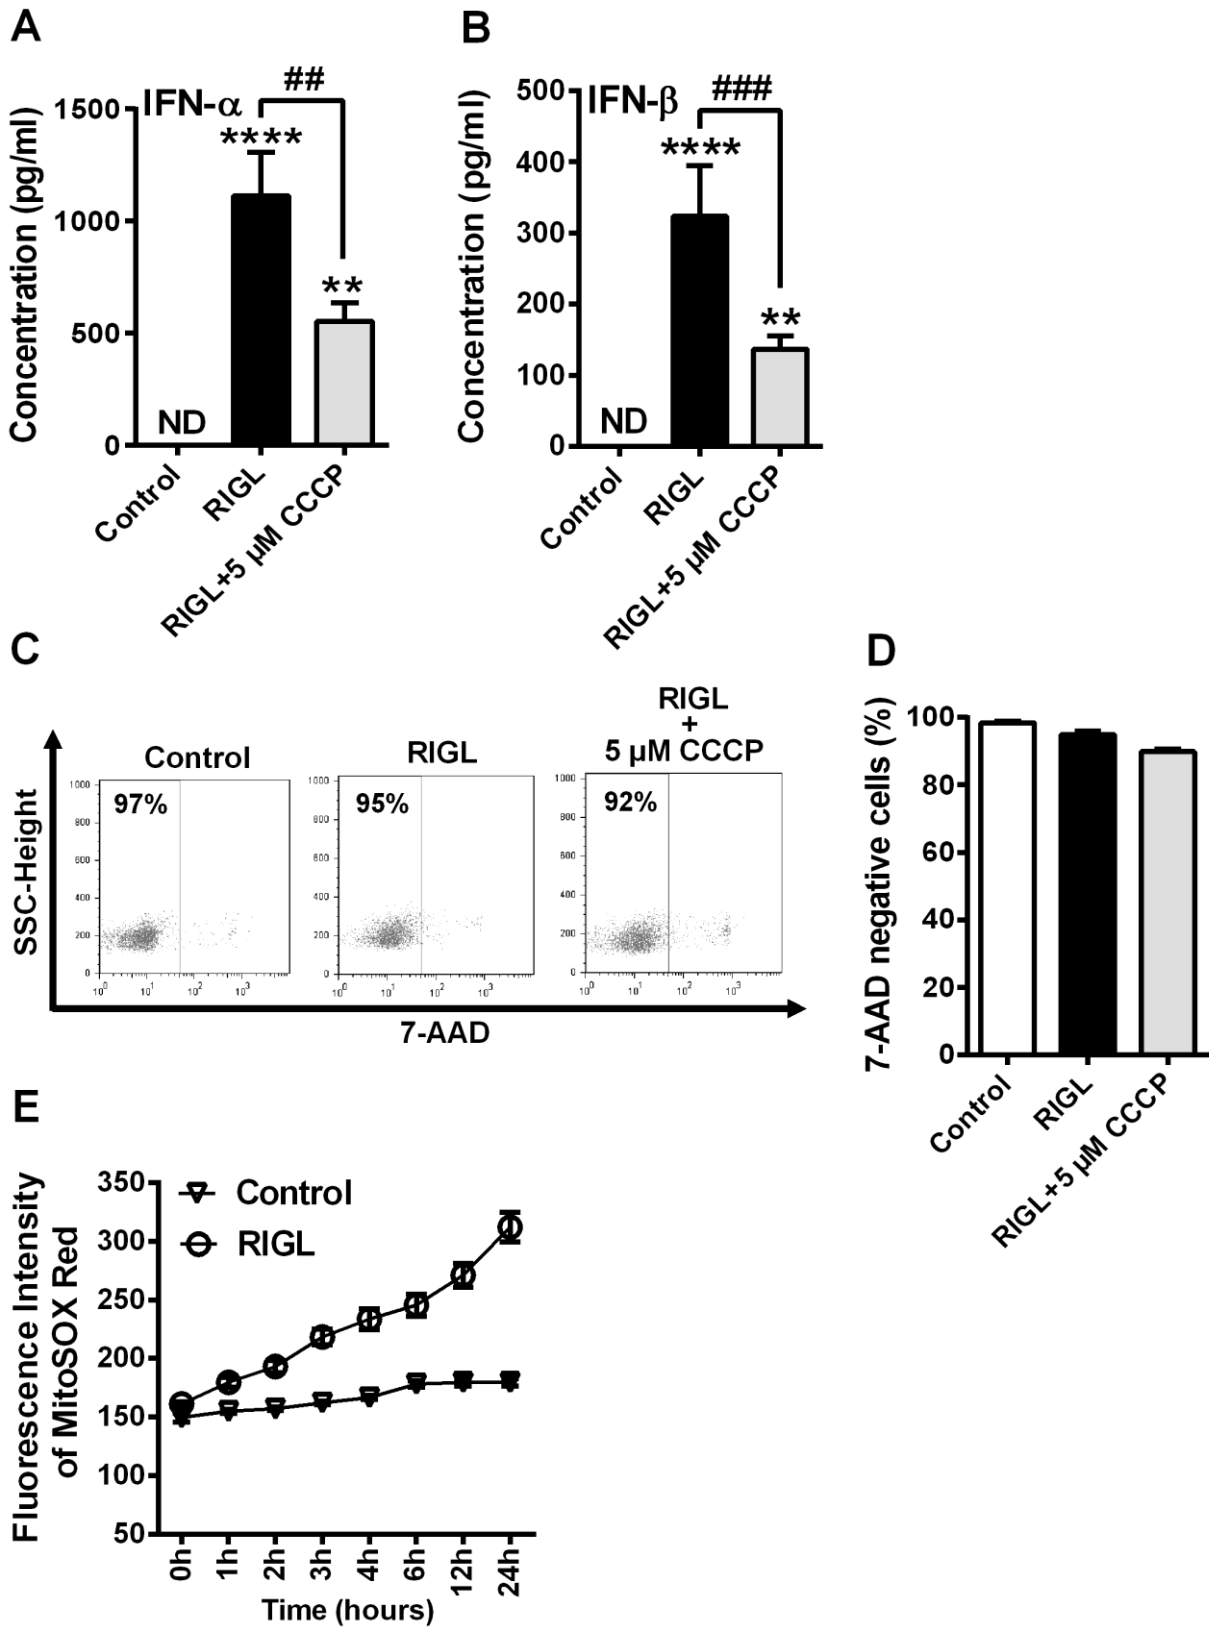

**Supplementary Figure 2.** Inhibition of oxidative phosphorylation (OXPHOS) affects the RIG-I-mediated type I IFN production in primary human pDCs. Freshly isolated primary human pDCs were pre-treated with CpG-A for 16 hours then following thorough washing steps stimulated with the RIG-I agonist 5'ppp-dsRNA in the presence or absence of 5  $\mu$ M CCCP. **(A,B)** IFN- $\alpha$  and IFN- $\beta$  protein levels were measured from the supernatants at 6 hours. **(C,D)** Cell viability was measured by 7-aminoactinomycin D (7-AAD) staining using flow cytometry. **(E)** The mtROS production was detected by MitoSOX<sup>TM</sup> Red mitochondrial superoxide indicator. The results of a representative experiment are shown. **(C)** Representative dot plots are shown and numbers indicate the percentage of 7-AAD negative cells. **(A,B,D)** Data represent the mean  $\pm$  SD of at least 3 individual experiments. \*\*p<0.01, \*\*\*\*p<0.0001 vs. control; ##p<0.01, ###p<0.001, ND: not determined

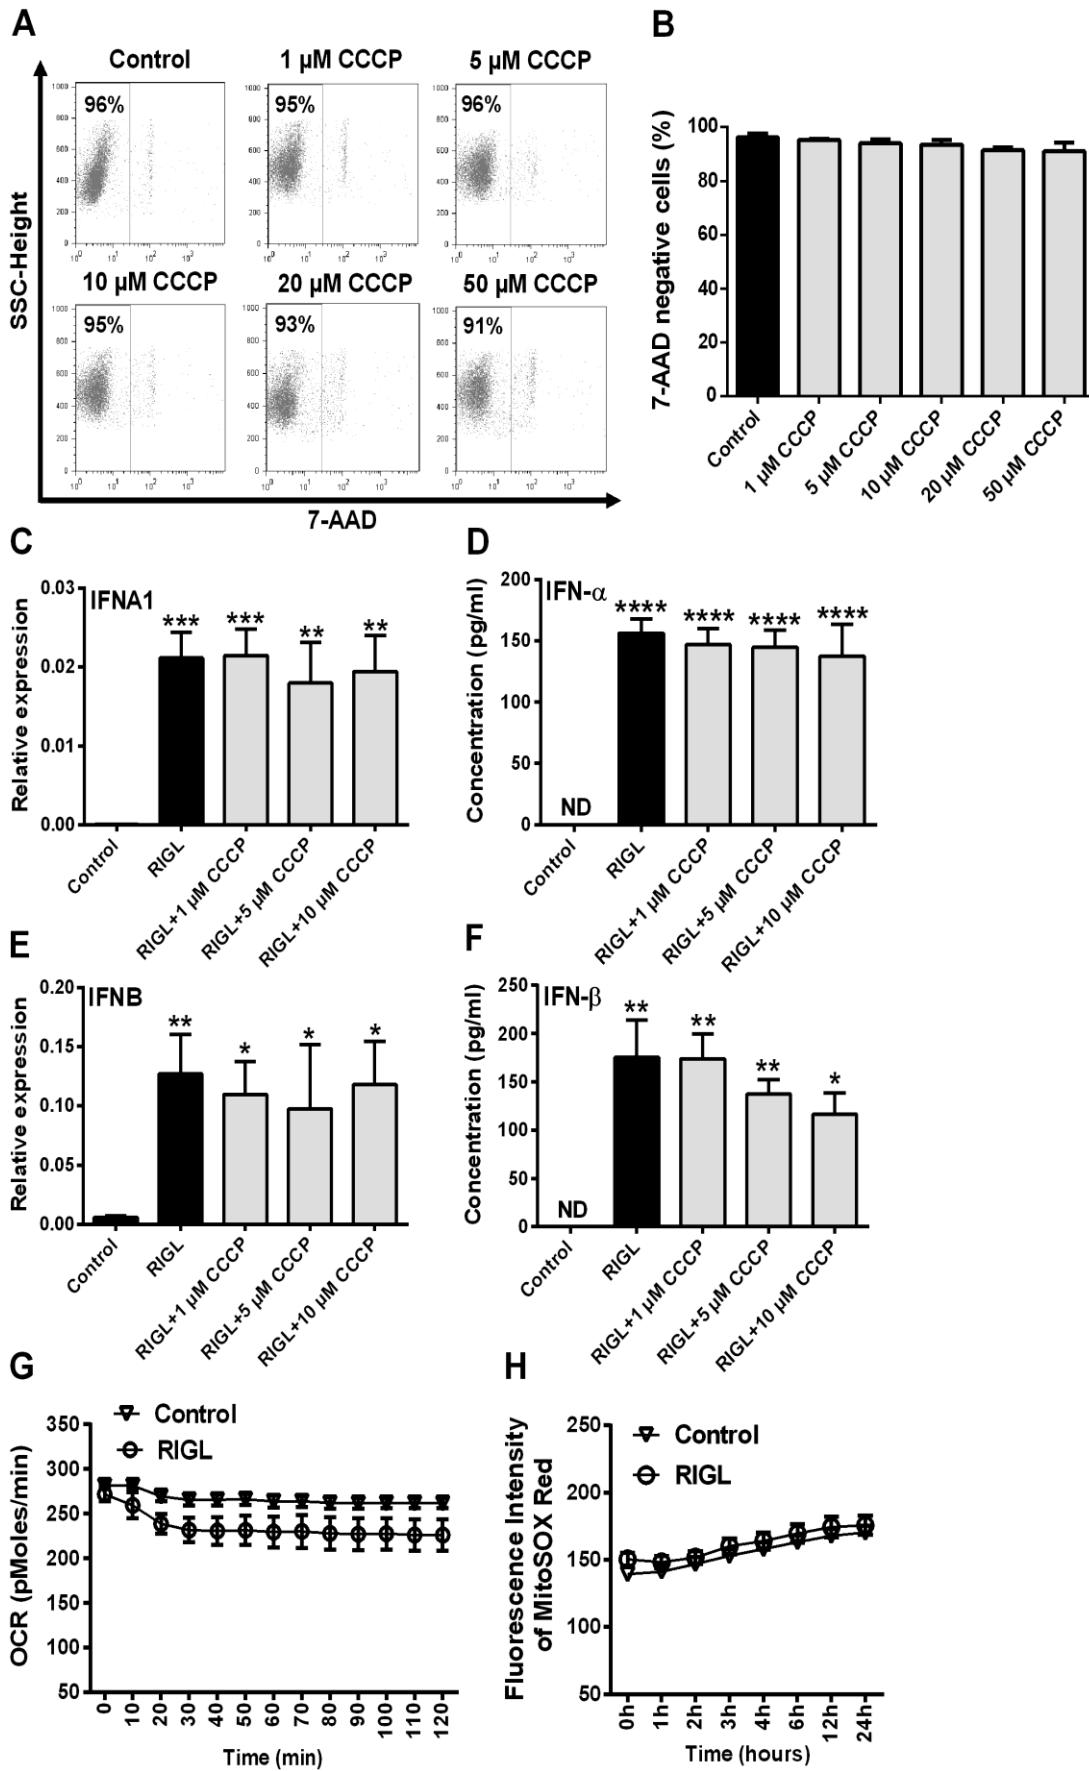

**Supplementary Figure 3.** Inhibition of oxidative phosphorylation (OXPHOS) does not affect the viability and RIG-I-mediated type I IFN production in human immature moDCs. **(A,B)** moDCs were treated with increasing concentration of the mitochondrial uncoupler carbonylcyanide m-chlorophenylhydrazone (CCCP; 1-50  $\mu$ M) then cell viability was analyzed by flow cytometry. **(C-F)** Cells were left untreated or stimulated with the RIG-I agonist 5'ppp-dsRNA (RIGL, 1  $\mu$ g/ml) in the presence or absence of CCCP (1, 5 and 10  $\mu$ M). After 12 hours the expression of IFN- $\alpha$  and IFN- $\beta$  was measured at the mRNA level by Q-PCR **(C,E)** and at the protein level by ELISA **(D,F)**. **(G)** Following activation with 5'ppp-dsRNA real-time OCR was determined by EFA. The results of a representative experiment are shown. **(H)** The mtROS production was detected using MitoSOX<sup>TM</sup> Red mitochondrial superoxide indicator. The results of a representative experiment are shown. **(A)** Representative dot plots are shown and numbers indicate the percentage of 7-aminoactinomycin D (7-AAD) negative cells. **(B-F)** Data represent the mean  $\pm$  SD of at least 3 individual experiments. \* $p$ <0.05, \*\* $p$ <0.01, \*\*\* $p$ <0.001, \*\*\*\* $p$ <0.0001 vs. control, ND: not determined
